# Supplementary material for: Composite likelihood method for inferring local pedigrees
Source: PubMed Central journal article supplement (PMC5578687; doi:10.1371/journal.pgen.1006963), 2017-08-21
Supplement: pgen.1006963.s005.pdf [file pgen.1006963.s005.pdf]

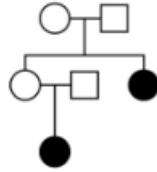

Figure 3: Different types of pedigrees inferred by CLAPPER for the pedigree shown by Fig 1B.

relatively low such as that shown by Fig 1A, the degree of relationship is correctly inferred by CLAPPER. However, when the level of inbreeding is very high such as that shown by Fig 1B, CLAPPER estimates that the relationship is closer than the true relationship.
