# Supplementary material for: Composite likelihood method for inferring local pedigrees
Source: PubMed Central journal article supplement (PMC5578687; doi:10.1371/journal.pgen.1006963), 2017-08-21

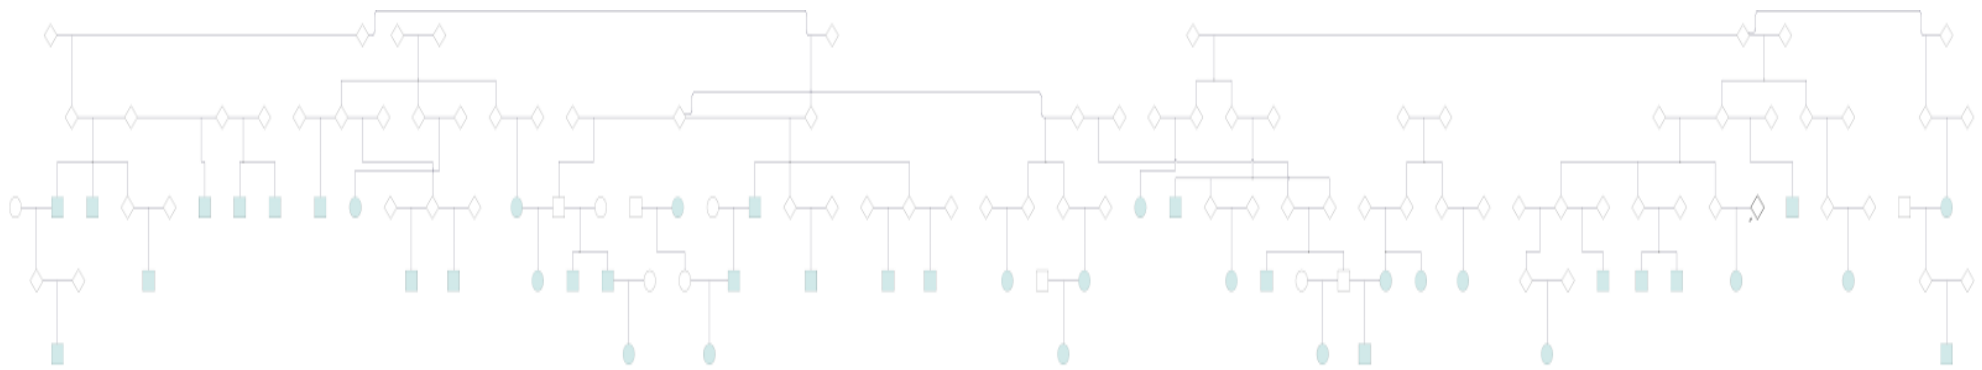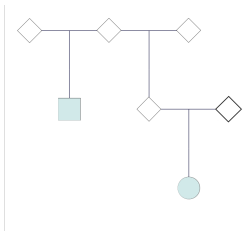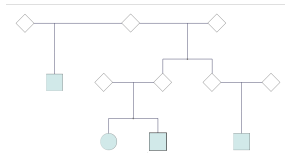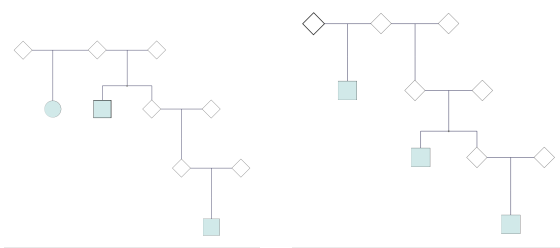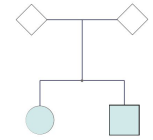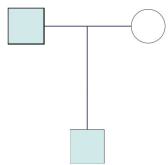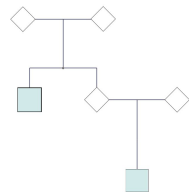

Supplement: pgen.1006963.s009.pdf [file pgen.1006963.s009.pdf]
